# Supplementary material for: Phage-Display Based Discovery and Characterization of Peptide Ligands against WDR5
Source: PubMed Central journal article supplement (PMC7956166; doi:10.3390/molecules26051225), 2021-02-25
Supplement: molecules-26-01225-s001.pdf [file molecules-26-01225-s001.pdf]

Article (Supporting information)

# Phage-display Based discovery and Characterization of Peptide Ligands against WDR5

Jiawen Cao<sup>1,2</sup>, Tiantian Fan<sup>1,2</sup>, Yanlian Li<sup>2</sup>, Zhiyan Du<sup>2</sup>, Lin Chen<sup>2</sup>, Ying Wang<sup>2</sup>, Xin Wang<sup>2</sup>, Jingkang Shen<sup>2</sup>, Xun Huang<sup>3</sup>, Bing Xiong<sup>2,\*</sup>, Danyan Cao<sup>2,\*</sup>

<sup>1</sup> Department of Medicinal Chemistry, Shanghai Institute of Materia Medica, Chinese Academy of Sciences, 555 Zuchongzhi Road, Shanghai 201203, China; University of Chinese Academy of Sciences, No. 19A Yuquan Road, Beijing 100049, China

<sup>2</sup> Department of Medicinal Chemistry, Shanghai Institute of Materia Medica, Chinese Academy of Sciences, 555 Zuchongzhi Road, Shanghai 201203, China

\* Division of Anti-Tumor Pharmacology, Shanghai Institute of Materia Medica, Chinese Academy of Sciences, 555 Zuchongzhi Road, Shanghai 201203, China; University of Chinese Academy of Sciences, No. 19A Yuquan Road, Beijing 100049, China

Received: 19 December 2020; Accepted: 21 February 2021; Published: 25 February 2021

## Table of Content

- 1) **Figure S1. Sequencing data**
- 2) **Figure S2. The phage clone sequencing results of the fifth bopanning**
- 3) **Figure S3. HPLC and MS spectra of synthesized peptides**
- 4) **Table S1. Crystallography Table**
- 5) **Figure S4. Cocrystal structure comparison**



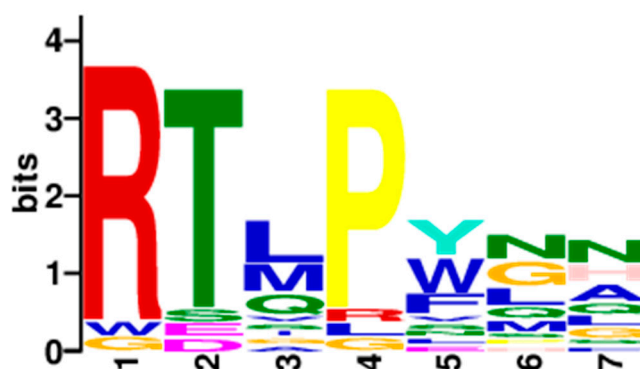

Figure S2. The phage clone sequencing results of the fifth bopanning.

## Synthetic information of peptide D206115

A

Peptide Name: Custom Peptide  
 Purchase order number: D206115  
 Lot Number: FL-08-0115  
 Sequence: H-Cys-Arg-Thr-Leu-Pro-Phe-His-Glu-Cys-OH (Cys&Cys bridge)  
 Molecular Weight (daltons) : 1103.3  
 Final Purity (HPLC%) : 95.5%  
 Amount Supplied: 5mg  
 Appearance: White lyophilized powder  
 Storage Conditions: Long Term: -20°C; Short Term: 2°C~8°C

## Sample information

Sample Name: D206115/FL-08-0115 Collector: System  
 Sample Type : Unknown Sample Group Name: A20090701  
 Sample Bottle: 26 Collection Method Group: 15%\_45%\_B\_08\_215\_method group  
 Number of Injections: 1 Approach: M20090702  
 Injection Volume: 15.00 µl Channel Name: DAD.0.0  
 Running Time: 25.0 Minutes Processing Channel Description: DAD: Signal A, 215nm/ broadband: 4nm

Acquisition Time: 2020/9/7 12:56:59 CST

Processing Time: 2020/9/7 13:25:47 CST

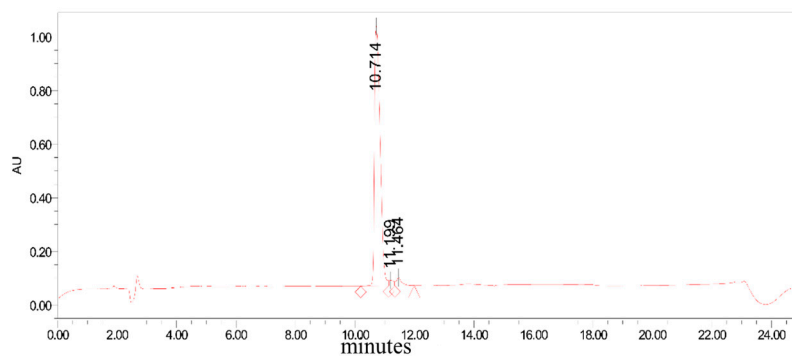

Peak Results

| Name | Retention Time(minute) | %Area | Area(Microvolt*second) | Height(Microvolt) |
|------|------------------------|-------|------------------------|-------------------|
| 1    | 10.714                 | 95.52 | 12876617               | 967724            |
| 2    | 11.199                 | 1.59  | 214838                 | 20370             |
| 3    | 11.464                 | 2.88  | 388609                 | 30139             |

## Mass Spectrum SmartFormula Report

## Analysis Info

Analysis Name D:\Data\ESI-Luh-200910-D206115\_01.d  
 Method ESI+100-800-200910.m  
 Sample Name  
 Comment

Acquisition Date 9/10/2020 3:56:44 PM

Operator BDAL@DE

Instrument / Ser# microTOF-Q II 228888.10  
324

## Acquisition Parameter

Source Type ESI Ion Polarity Positive Set Nebulizer 1.2 Bar  
 Focus Active Set Capillary 4800 V Set Dry Heater 220 °C  
 Scan Begin 100 m/z Set End Plate Offset -500 V Set Dry Gas 3.5 l/min  
 Scan End 2000 m/z Set Collision Cell RF 200.0 Vpp Set Divert Valve Source

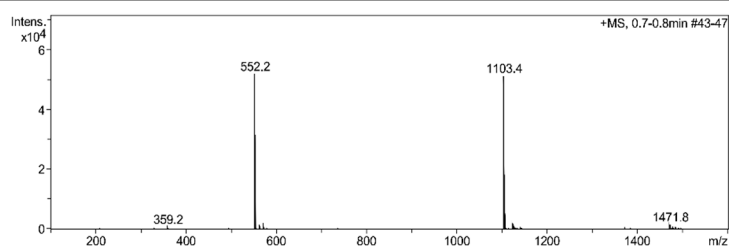

## Synthetic information of peptide D206116

B

Peptide Name: Custom Peptide  
 Purchase order number: D206116  
 Lot Number: FL-08-0116  
 Sequence: H-Cys-Glu-Lys-Met-Val-Ala-Thr-His-Cys-OH (Cys&Cys bridge)  
 Molecular Weight (daltons) : 1019.2  
 Final Purity (HPLC%) : 95.3%  
 Amount Supplied: 5mg  
 Appearance: White lyophilized powder  
 Storage Conditions: Long Term: -20°C; Short Term: 2°C ~ 8°C

## Sample information

Sample Name: D206116/FL-08-0116 Collector: System  
 Sample Type : Unknown Sample Group Name: A20090701  
 Sample Bottle: 25 Collection Method Group: 10\_40 B 07\_method group  
 Number of Injections: 1 Approach: M20090701  
 Injection Volume: 20.00 µl Channel Name: DAD.0.0  
 Running Time: 20.0 Minutes Processing Channel Description: DAD: Signal A, 220nm/ broadband: 4nm  
 Acquisition Time: 2020/9/7 9:48:30 CST  
 Processing Time: 2020/9/7 10:16:22 CST

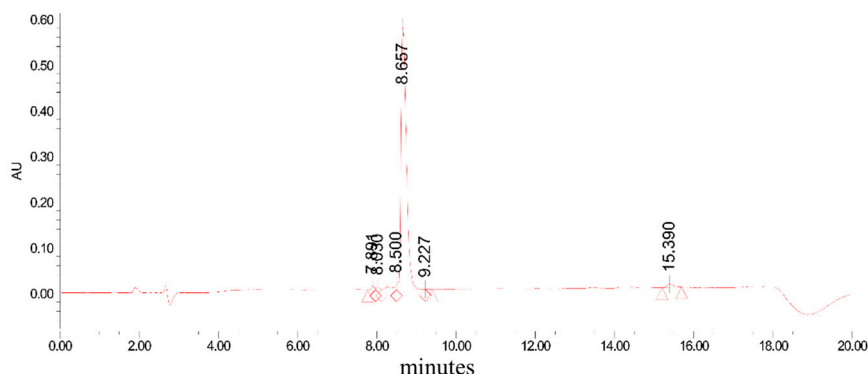

Peak Results

| Name | Retention Time(minute) | %Area | Area(Microvol*second) | Height(Microvolt) |
|------|------------------------|-------|-----------------------|-------------------|
| 1    | 7.891                  | 0.77  | 44053                 | 8585              |
| 2    | 8.030                  | 0.60  | 34259                 | 5825              |
| 3    | 8.500                  | 1.81  | 103077                | 10494             |
| 4    | 8.657                  | 95.35 | 5444349               | 574761            |
| 5    | 9.227                  | 0.04  | 2153                  | 611               |
| 6    | 15.390                 | 1.44  | 82050                 | 6740              |

## Mass Spectrum SmartFormula Report

**Analysis Info**  
 Analysis Name: D:\Data\ESI-Luh-200910-D206116\_01.d Acquisition Date: 9/10/2020 3:45:29 PM  
 Method: ESI+100-800-200910.m Operator: BDAL@DE  
 Sample Name: Instrument / Ser#: microTOF-Q II 228888.10  
 Comment: 324

## Acquisition Parameter

|             |          |                       |           |                  |           |
|-------------|----------|-----------------------|-----------|------------------|-----------|
| Source Type | ESI      | Ion Polarity          | Positive  | Set Nebulizer    | 1.2 Bar   |
| Focus       | Active   | Set Capillary         | 4800 V    | Set Dry Heater   | 220 °C    |
| Scan Begin  | 100 m/z  | Set End Plate Offset  | -500 V    | Set Dry Gas      | 3.5 l/min |
| Scan End    | 2000 m/z | Set Collision Cell RF | 200.0 Vpp | Set Divert Valve | Source    |

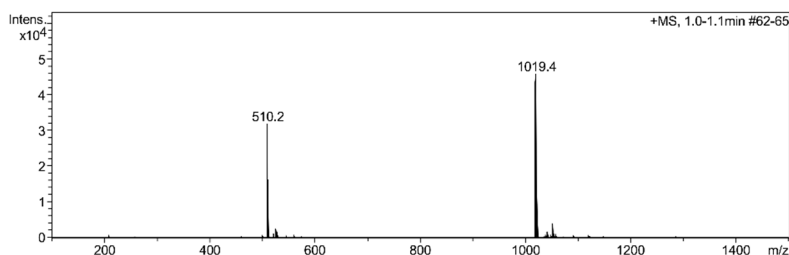

## Synthetic information of peptide D206179

C

Peptide Name: Custom Peptide  
 Purchase order number: D206179  
 Lot Number: FL-10-0039  
 Sequence: H-Cys-Arg-Thr-Leu-Pro-Trp-Asn-Asn-Cys-OH (Cys&Cys bridge)  
 Molecular Weight (daltons) : 1104.3  
 Final Purity (HPLC%) : 97.6%  
 Amount Supplied: 5mg  
 Appearance: White lyophilized powder  
 Storage Conditions: Long Term: -20°C; Short Term: 2°C ~ 8°C

## Sample information

Sample Name: D206179/FL-10-0039 Collector: System  
 Sample Type : Unknown Sample Group Name: A20102602  
 Sample Bottle: 1 Collection Method Group: 20\_50 B\_method group  
 Number of Injections: 1 Approach: M20102602  
 Injection Volume: 10.00 ul Channel Name: DAD.0.0  
 Running Time: 20.0 Minutes Processing Channel Description: DAD: Signal A, 215nm/ broadband: 4nm  
 Acquisition Time: 2020/10/26 12:46:44 CST  
 Processing Time: 2020/10/26 13:43:37 CST

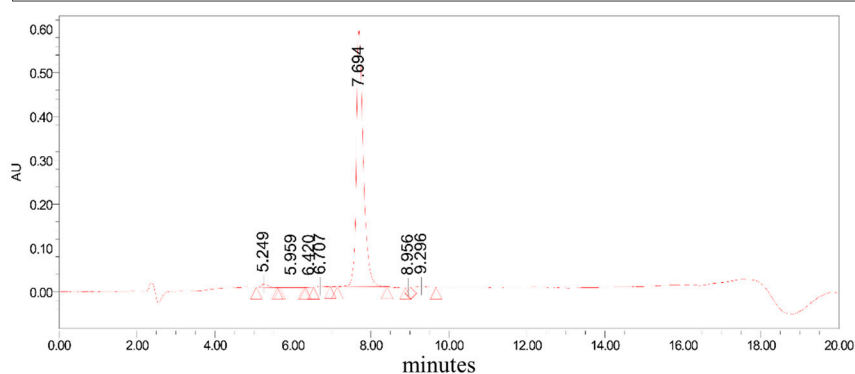

## Peak Results

| Name | Retention Time(minute) | %Area | Area(Microvolt*second) | Height(Microvolt) |
|------|------------------------|-------|------------------------|-------------------|
| 1    | 5.249                  | 1.20  | 90347                  | 7413              |
| 2    | 5.959                  | 0.20  | 15414                  | 1087              |
| 3    | 6.420                  | 0.03  | 2268                   | 307               |
| 4    | 6.707                  | 0.25  | 19164                  | 1739              |
| 5    | 7.694                  | 97.68 | 7382491                | 585540            |
| 6    | 8.956                  | 0.02  | 1678                   | 387               |
| 7    | 9.296                  | 0.61  | 46214                  | 2956              |

## Mass Spectrum SmartFormula Report

**Analysis Info**  
 Analysis Name: D:\Data\ESI-LUH-201026-D206179\_01.d Acquisition Date: 10/26/2020 3:57:27 PM  
 Method: lcms-5-55.m Operator: BDAL@DE  
 Sample Name: Instrument / Ser#: microTOF-Q II 228888.10  
 Comment: 324

**Acquisition Parameter**  
 Source Type: ESI Ion Polarity: Positive Set Nebulizer: 1.8 Bar  
 Focus: Active Set Capillary: 4800 V Set Dry Heater: 220 °C  
 Scan Begin: 100 m/z Set End Plate Offset: -500 V Set Dry Gas: 6.0 l/min  
 Scan End: 2000 m/z Set Collision Cell RF: 200.0 Vpp Set Divert Valve: Waste

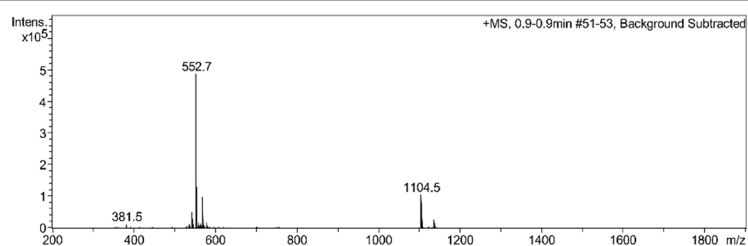

## Synthetic information of peptide D206180

D

Peptide Name: Custom Peptide  
 Purchase order number: D206180  
 Lot Number: FL-10-0040  
 Sequence: H-Cys-Arg-Thr-Leu-Pro-Tyr-Gly-Ala-Cys-OH (Cys&Cys bridge)  
 Molecular Weight (daltons) : 981.2  
 Final Purity (HPLC%) : 99.6%  
 Amount Supplied: 5mg  
 Appearance: White lyophilized powder  
 Storage Conditions: Long Term: -20°C; Short Term: 2°C~8°C

## Sample information

Sample Name: D206180/FL-10-0040 Collector: System  
 Sample Type : Unknown Sample Group Name: A20102701  
 Sample Bottle: 4 Collection Method Group: 10\_40 B 07\_method group  
 Number of Injections: 1 Approach: M20102701  
 Injection Volume: 10.00 ul Channel Name: DAD.0.0  
 Running Time: 20.0 Minutes Processing Channel Description: DAD: Signal A, 220nm/ broadband: 4nm

Acquisition Time: 2020/10/27 9:12:30 CST  
 Processing Time: 2020/10/27 9:35:57 CST

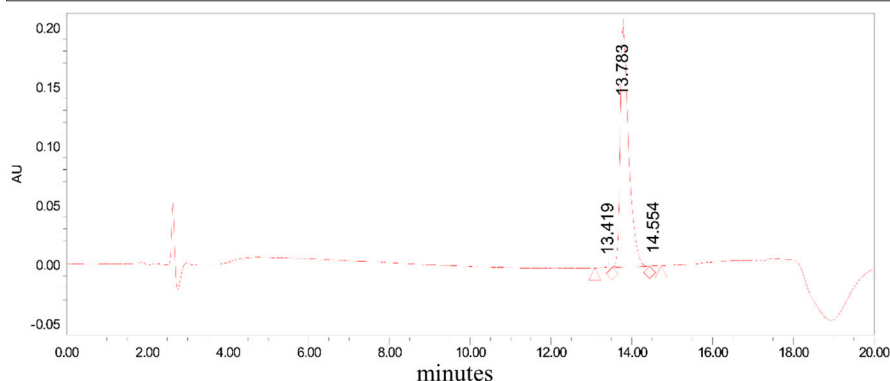

Peak Results

| Name | Retention Time(minute) | %Area | Area(Microvolt*second) | Height(Microvolt) |
|------|------------------------|-------|------------------------|-------------------|
| 1    | 13.419                 | 0.25  | 7550                   | 589               |
| 2    | 13.783                 | 99.61 | 2996771                | 202424            |
| 3    | 14.554                 | 0.14  | 4183                   | 380               |

## Mass Spectrum SmartFormula Report

**Analysis Info**  
 Analysis Name D:\Data\ESI-LUH-201026-D206180\_01.d Acquisition Date 10/26/2020 3:56:13 PM  
 Method lcms-5-55.m Operator BDAL@DE  
 Sample Name Instrument / Ser# microTOF-Q II 228888.10  
 Comment 324

**Acquisition Parameter**

|             |          |                       |           |                  |           |
|-------------|----------|-----------------------|-----------|------------------|-----------|
| Source Type | ESI      | Ion Polarity          | Positive  | Set Nebulizer    | 1.8 Bar   |
| Focus       | Active   | Set Capillary         | 4800 V    | Set Dry Heater   | 220 °C    |
| Scan Begin  | 100 m/z  | Set End Plate Offset  | -500 V    | Set Dry Gas      | 6.0 l/min |
| Scan End    | 2000 m/z | Set Collision Cell RF | 200.0 Vpp | Set Divert Valve | Waste     |

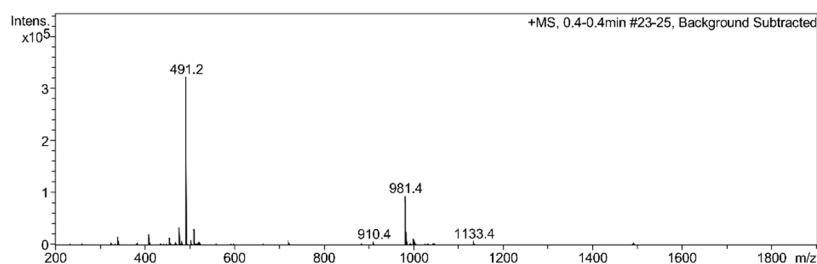

## Synthetic information of peptide D206181

E

Peptide Name: Custom Peptide  
 Purchase order number: D206181  
 Lot Number: FL-10-0041  
 Sequence: H-Cys-Arg-Thr-Leu-Pro-Phe-Gly-Ser-Cys-OH (Cys&Cys bridge)  
 Molecular Weight (daltons) : 981.2  
 Final Purity (HPLC%) : 96.0%  
 Amount Supplied: 5mg  
 Appearance: White lyophilized powder  
 Storage Conditions: Long Term: -20°C; Short Term: 2°C ~ 8°C

## Sample information

Sample Name: D206181/FL-10-0041      Collector: System  
 Sample Type : Unknown                      Sample Group Name: A20102701  
 Sample Bottle: 5                                Collection Method Group: 10\_40 B 07\_method group  
 Number of Injections: 1                      Approach: M20102702  
 Injection Volume: 10.00 ul                    Channel Name: DAD.0.0  
 Running Time: 20.0 Minutes                Processing Channel Description: DAD: Signal A, 220nm/ broadband: 4nm  
 Acquisition Time: 2020/10/27 9:33:57 CST  
 Processing Time: 2020/10/27 9:58:37 CST

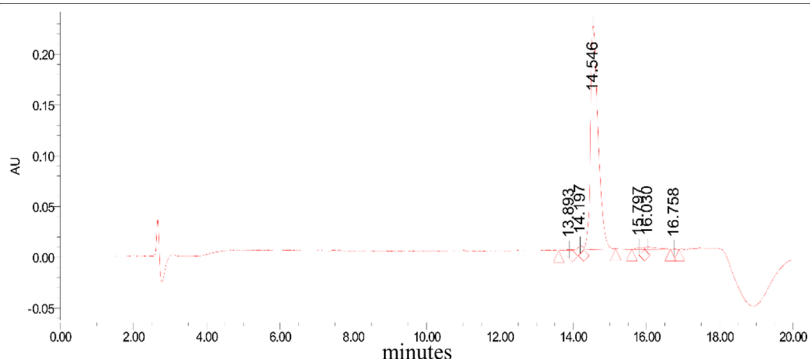

## Peak Results

| Name | Retention Time(minute) | %Area | Area(Microvolt*second) | Height(Microvolt) |
|------|------------------------|-------|------------------------|-------------------|
| 1    | 13.893                 | 0.35  | 11590                  | 913               |
| 2    | 14.197                 | 1.36  | 45358                  | 4471              |
| 3    | 14.546                 | 96.08 | 3214214                | 220311            |
| 4    | 15.797                 | 0.74  | 24747                  | 1771              |
| 5    | 16.030                 | 1.39  | 46390                  | 2145              |
| 6    | 16.758                 | 0.10  | 3222                   | 385               |

## Mass Spectrum SmartFormula Report

## Analysis Info

Analysis Name D:\Data\ESI-LUH-201026-D206181\_01.d  
 Method lcms-5-55.m  
 Sample Name  
 Comment

Acquisition Date 10/26/2020 3:58:52 PM

Operator BDAL@DE  
 Instrument / Ser# microTOF-Q II 228888.10  
 324

## Acquisition Parameter

|             |          |                       |           |                  |           |
|-------------|----------|-----------------------|-----------|------------------|-----------|
| Source Type | ESI      | Ion Polarity          | Positive  | Set Nebulizer    | 1.8 Bar   |
| Focus       | Active   | Set Capillary         | 4800 V    | Set Dry Heater   | 220 °C    |
| Scan Begin  | 100 m/z  | Set End Plate Offset  | -500 V    | Set Dry Gas      | 6.0 l/min |
| Scan End    | 2000 m/z | Set Collision Cell RF | 200.0 Vpp | Set Divert Valve | Waste     |

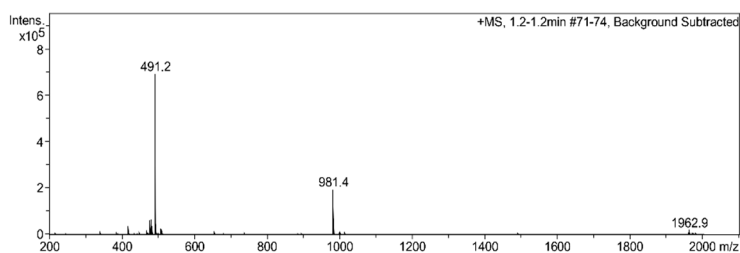



**Figure S3.** A) Synthetic information of peptide D206115. B) Synthetic information of peptide D206116. C) Synthetic information of peptide D206179. D) Synthetic information of peptide D206180. E) Synthetic information of peptide D206181.

**Table S1.** Data collection and refinement statistics.

| <b>WDR5-D206115</b>                   |                                          |
|---------------------------------------|------------------------------------------|
| <b>Wavelength</b>                     |                                          |
| <b>Resolution range</b>               | 30.31-2.03 (2.103-2.03)                  |
| <b>Space group</b>                    | P 1                                      |
| <b>Unit cell</b>                      | 46.735 53.912 64.788 69.817 88.79 74.163 |
| <b>Total reflections</b>              | 109572 (4876)                            |
| <b>Unique reflections</b>             | 32760 (1856)                             |
| <b>Multiplicity</b>                   | 3.3 (2.6)                                |
| <b>Completeness (%)</b>               | 88.98 (50.71)                            |
| <b>Mean I/sigma(I)</b>                | 12.16 (2.05)                             |
| <b>Wilson B-factor</b>                | 28.18                                    |
| <b>R-merge</b>                        | 0.072 (0.4408)                           |
| <b>R-meas</b>                         | 0.08559 (0.5513)                         |
| <b>R-pim</b>                          | 0.04565 (0.3239)                         |
| <b>CC1/2</b>                          | 0.998 (0.846)                            |
| <b>CC*</b>                            | 0.999 (0.957)                            |
| <b>Reflections used in refinement</b> | 32718 (1855)                             |
| <b>Reflections used for R-free</b>    | 1621 (92)                                |
| <b>R-work</b>                         | 0.1792 (0.2818)                          |
| <b>R-free</b>                         | 0.2268 (0.3263)                          |
| <b>CC(work)</b>                       | 0.968 (0.862)                            |
| <b>CC(free)</b>                       | 0.946 (0.704)                            |
| <b>Number of non-hydrogen atoms</b>   | 5092                                     |

---

|                                  |       |
|----------------------------------|-------|
| <b>macromolecules</b>            | 4786  |
| <b>solvent</b>                   | 306   |
| <b>Protein residues</b>          | 618   |
| <b>RMS(bonds)</b>                | 0.008 |
| <b>RMS(angles)</b>               | 1.06  |
| <b>Ramachandran favored (%)</b>  | 93.40 |
| <b>Ramachandran allowed (%)</b>  | 6.11  |
| <b>Ramachandran outliers (%)</b> | 0.50  |
| <b>Rotamer outliers (%)</b>      | 0.19  |
| <b>Clashscore</b>                | 5.87  |
| <b>Average B-factor</b>          | 32.80 |
| <b>macromolecules</b>            | 32.55 |
| <b>solvent</b>                   | 36.64 |

---

Note: Statistics for the highest-resolution shell are shown in parentheses.

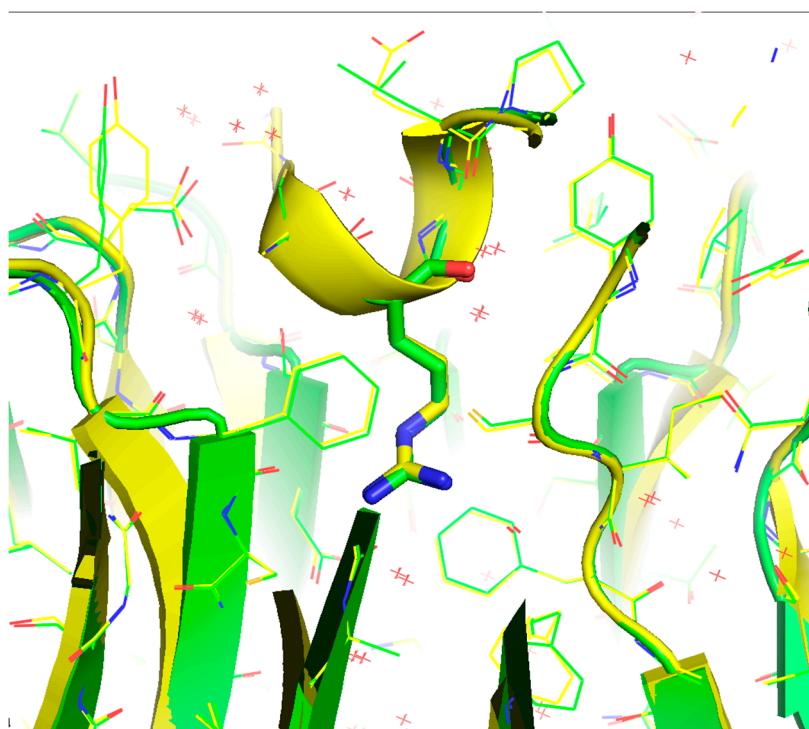

Figure S4. The comparison of cocrystal structure.
